# Supplementary material for: Enhanced power generation using nano cobalt oxide anchored nitrogen-decorated reduced graphene oxide as a high-performance air-cathode electrocatalyst in biofuel cells
Source: Royal Society of Chemistry journal article supplement (doi:10.1039/c6ra11095a), 2016-01-01
Supplement: c6ra11095a1.pdf [file c6ra11095a1.pdf]

**Enhanced power generation using nano cobalt oxide anchored  
nitrogen-decorated reduced graphene oxide as high-performance  
air-cathode electrocatalyst in biofuel cells**

Chun Cao<sup>a,b</sup>, Liling Wei<sup>a\*</sup>, Min Su<sup>a,b</sup>, Gang Wang<sup>a,b</sup>, Jianquan Shen<sup>a\*</sup>

*<sup>a</sup> Beijing National Laboratory for Molecular Sciences (BNLMS), Key Laboratory of  
Green Printing, Institute of Chemistry, Chinese Academy of Sciences, Zhongguancun  
North First Street 2, Beijing 100190, P.R.China.*

*<sup>b</sup> University of Chinese Academy of Science, Beijing, 100049, P.R.China*

\* Corresponding Author: E-mail: weill@iccas.ac.cn; Tel.: +86 10 61934539; Fax:  
+86 10 62559373.

\*\* Corresponding Author: E-mail: jqshen@iccas.ac.cn; Tel.: +86 10 61934539; Fax:  
+86 10 62559373.

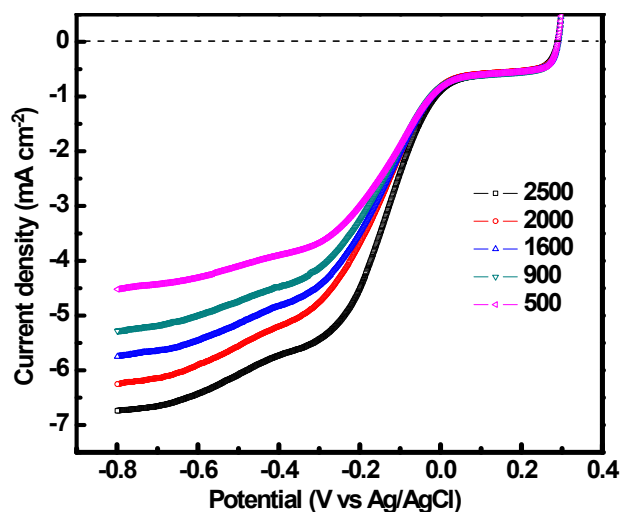

Fig. S1 LSV curves of NG/Co-NS with rotation speed range from 500 to 2500 rpm min<sup>-1</sup>

1

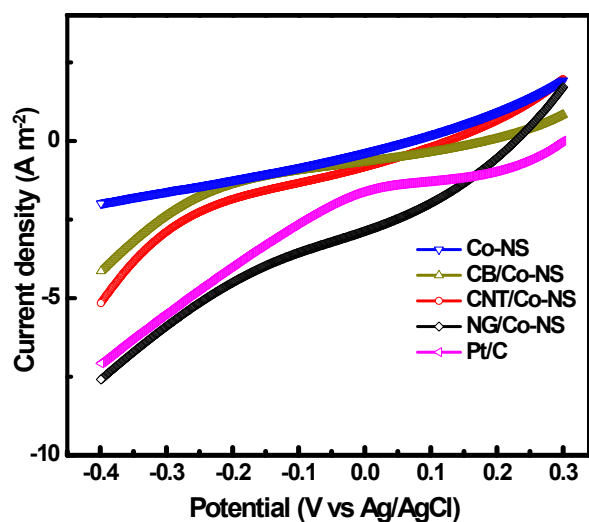

Fig. S2 The LSV curves of different catalysts modified air-cathode in real MFCs.

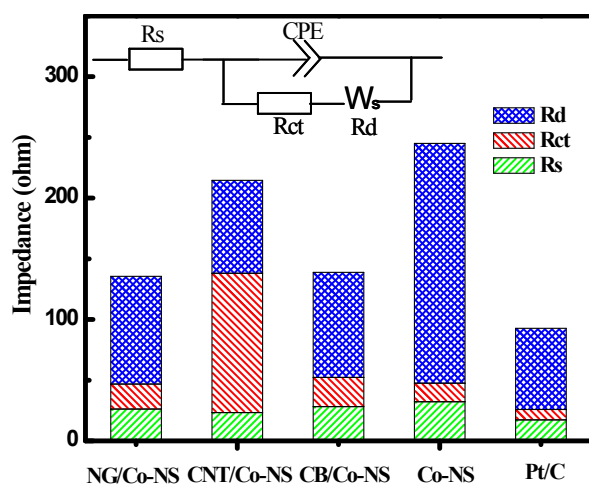

Fig. S3 The resistance distribution (insert picture is the characteristic equivalent electrocircuit) of different catalysts modified air-cathode MFCs.
